# Supplementary material for: Prognostic factors of locally advanced cervical cancer after concurrent chemoradiotherapy
Source: Research Square preprint supplement (doi:10.21203/rs.3.rs-5678120/v1), 2025-03-25
Supplement: Supplementary file 1 [file 3f68a5c86bc71c3c957edab1.docx]

| 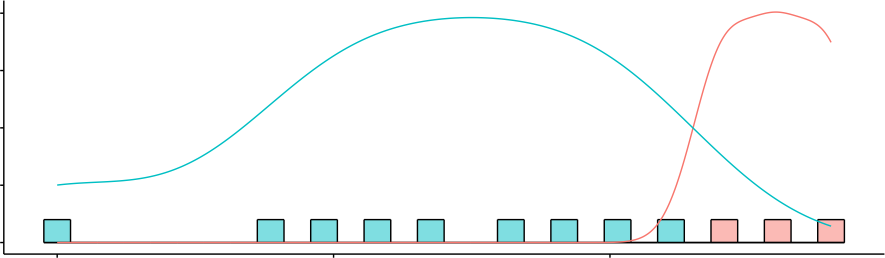  **Standardized Log−Rank Statistic Density**  **10.0**  **7.5**  **5.0**  **2.5**  **0.0** | **Distribution**  The optimal cutoff value of residual disease for PFS  **0.0 0.5 1.0** | | | | |
| --- | --- | --- | --- | --- | --- |
| **Maximally Selected Rank Statistics** | | | | | **groups**  ● **high**  ● **low** |
| **6**  ●  ●  ●  ● | | ● | | ● |
| ●  ●  ● | ● |
| ●  **4**  ●  **2** | | | | |
| **Cutpoint: 1.1**  **0**  **0.0 0.5 1.0**  **Residual disease size** | | | | | |
