# Supplementary material for: Prognostic factors of locally advanced cervical cancer after concurrent chemoradiotherapy
Source: Research Square preprint supplement (doi:10.21203/rs.3.rs-5678120/v1), 2025-03-25
Supplement: Supplementary file 2 [file 48c02b42c5560520cffe42a2.docx]

The optimal cutoff value of SCC for PFS

| Distribution | | | | |
| --- | --- | --- | --- | --- |
| Density | 10.0  7.5  5.0  2.5  0.0 | | 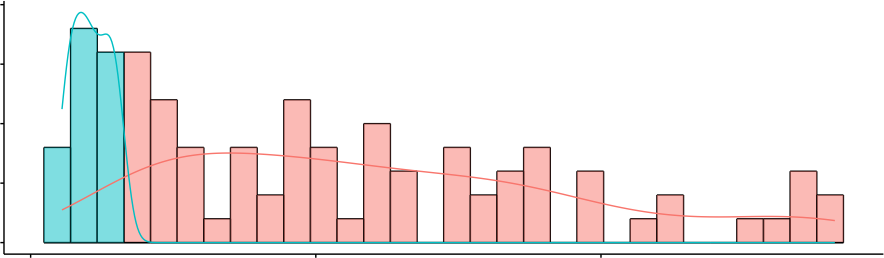  0 10 20 | |
| Maximally Selected Rank Statistics | | | | |
| 4  Standardized Log−Rank Statistic  3  2  1  0 | | **●**  **●**  **●**  **●**  **●**  **●**  **●**  **●**  **●**  **●**  **●**  **●**  **●**  **●**  **●**  **●**  **●**  **●**  **●**  **●**  **●**  **●**  **●**  **●**  **●**  **●**  **●**  **●**  **●**  **●**  **●**  **●**  **●**  **●**  **●**  **●**  **●**  **●**  **●**  **●**  **●**  **●**  **●**  **●**  **●**  **●**  **●**  **●**  **●**  **●**  **●**  **●**  **●**  **●**  **● ●**  **●**  **●**  **●**  **●**  **●**  **●**  **●**  **●**  **●**  **●**  **●**  **●**  **●**  **●**  **●**  **●**  **●**  **● ●**  **●**  **●**  **●**  **●**  **●**  **●**  **● ●**  **●**  **●**  **●**  **●●**  **●**  **●**  **●**  Cutpoint: 3.2  0 10 20  SCC | | grps  **●** high **●** low |
