# Supplementary material for: Prognostic factors of locally advanced cervical cancer after concurrent chemoradiotherapy
Source: Research Square preprint supplement (doi:10.21203/rs.3.rs-5678120/v1), 2025-03-25
Supplement: Supplementary file 3 [file 6b905c01bc8f686c53b83029.docx]

The optimal cutoff value of SCC for OS

| Distribution | | | | |
| --- | --- | --- | --- | --- |
| Density  7.5  5.0  2.5  0.0 | | | 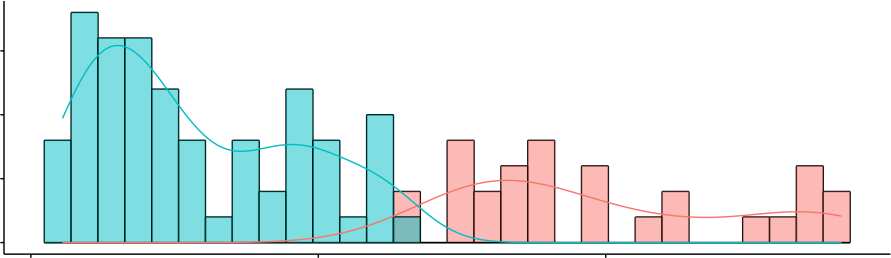  0 10 20 | |
| Maximally Selected Rank Statistics | | | | |
| Standardized Log−Rank Statistic | 4  3  2  1  0 | **●**  **●**  **●**  **●**  **●●**  **●**  **●**  **●**  **●**  **●**  **●**  **●**  **●●**  **●**  **●**  **●●**  **●**  **●● ●●**  **●**  **●**  **●**  **●**  **●**  **●**  **●**  **●**  **●**  **●**  **●**  **●**  **●**  **●**  **●**  **●**  **●**  **●**  **●**  **●**  **●**  **●**  **●**  **●**  **●**  **●**  **●**  **●**  **●**  **●**  **● ●●**  **●**  **●**  **●**  **●●**  **●**  **●**  **●**  **●**  **●**  **●●**  **●**  **●**  **●**  **●**  **●**  **●**  **●**  **●**  **●**  **●**  **●**  **●**  **●**  **●**  **●**  **●**  **●**  **●**  **●**  **●**  **●**  **●**  Cutpoint: 12.8  0 10 20  SCC | | grps  **●** high **●** low |
