# Supplementary material for: Prognostic factors of locally advanced cervical cancer after concurrent chemoradiotherapy
Source: Research Square preprint supplement (doi:10.21203/rs.3.rs-5678120/v1), 2025-03-25
Supplement: Supplementary file 4 [file a9256b8e9bcc9c47c5467391.docx]

**Proportion of missings**

**0.00 0.01 0.02 0.03 0.04 0.05 0.06**


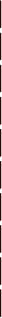


**age**

**Stage**

**SCC**

**Hemoglobin**

**Pelvic lymph node Tumor size Chemothrapy**

**Duration of radiotherapy Extended radiotherapy Residual disease size**

**Pretreatment ADCmean**

|  |
| --- |

**Post-treatment ADCmean**

|  |
| --- |

**Combinations**


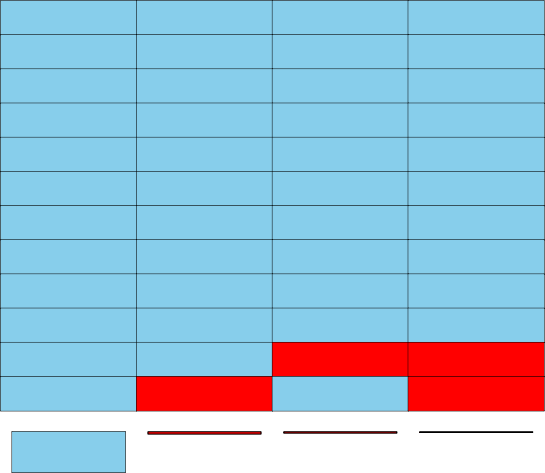


**age**

**Stage**

**SCC**

**Hemoglobin**

**Pelvic lymph node**

**Tumor size**

**Chemothrapy**

**Duration of radiotherapy**

**Extended radiotherapy**

**Residual disease size**

**Pretreatment ADCmean**

**Post-treatment ADCmean**
