# Supplementary material for: Prognostic factors of locally advanced cervical cancer after concurrent chemoradiotherapy
Source: Research Square preprint supplement (doi:10.21203/rs.3.rs-5678120/v1), 2025-03-25
Supplement: Supplementary file 6 [file bbc466cef824fdbfc6195448.docx]

The optimal cutoff value of Post-treatment ADCmean for OS

**Standardized Log−Rank Statistic Density**

| **Distribution** | | | | |
| --- | --- | --- | --- | --- |
| **Density** | **80**  **60**  **40**  **20**  **0** | | 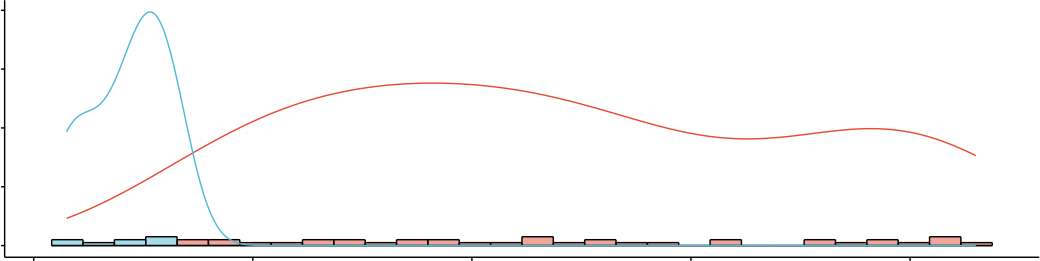  **1.2 1.4 1.6 1.8 2.0** | |
| **Maximally Selected Rank Statistics** | | | | |
| **2**  **1**  **0** | | **Cutpoint: 1.33**  1.2 1.4 1.6 1.8 2.0  ●  ●  ●  ●  ●  ●  ●  ●  ●  ●  ●  ●  ●  ●  ●  ●  ●  ●  ●  ●  ●  ●  ●  ●  ●  ●  ●  ●  ●  ●  ●  ●  ●  ●  ●  ●  ●  ●  ●  ●  ●  ●  ●  ●  ●  **Post-treatment ADCmean** | | **groups**  ● **high**  ● **low** |
