# Supplementary material for: Prognostic factors of locally advanced cervical cancer after concurrent chemoradiotherapy
Source: Research Square preprint supplement (doi:10.21203/rs.3.rs-5678120/v1), 2025-03-25
Supplement: Supplementary file 7 [file cacf65ea039debaab3779663.docx]

The optimal cutoff value of Post-treatment ADCmean for PFS

**Standardized Log−Rank Statistic Density**

| **Distribution** | | | |
| --- | --- | --- | --- |
| **60**  **40**  **20**  **0** | | 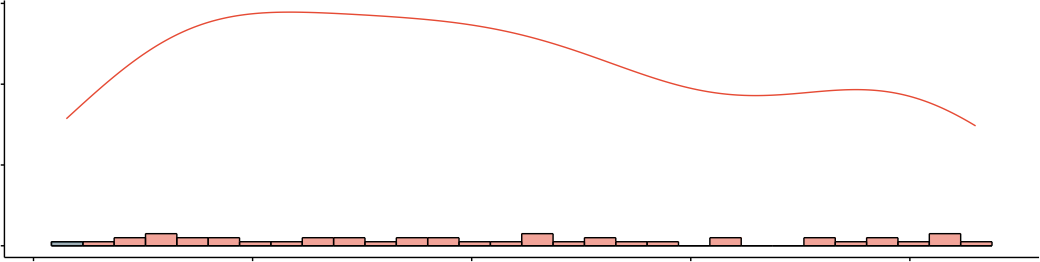  **1.2 1.4 1.6 1.8 2.0** | |
| **Maximally Selected Rank Statistics** | | | |
| **4**  **3**  **2**  **1**  **0** | **Cutpoint: 1.23**  ●  ●  ●  ●  ●  ●  ●  ●  ●  ● ●  ●  ● ●  ●  ●  ●  ●  ●  ●  ●  ●  ●  ●  ●  ●  ●  ●  ●  ●  ●  ●  ●  ●  ●  ●  ● ●  ●  ● ●  ●  ●  ●  ● | | **groups**  ● **high**  ● **low** |
| **1.2 1.4 1.6 1.8 2.0**  **Post-treatment ADCmean** | |
